# Supplementary material for: Assessing the impact of acute severe hypertension in the emergency department: A prospective cohort study in Karachi, Pakistan
Source: PubMed Central journal article supplement (PMC11616827; doi:10.1371/journal.pgph.0003948), 2024-12-04
Supplement: pgph.0003948.s002.pdf [file pgph.0003948.s002.pdf]

# Triage history

---

Patient ID

---

---

Date of triage.

---

---

Time of triage

---

---

Triage Category

 P1 P2 P3

---

Sex of the patient

 Male Female

---

Systolic Blood pressure

---

((in mm of Hg))

---

Diastolic Blood Pressure

---

((in mm of Hg))

---

Pulse

---

((in beats/min))

---

Temperature

(if patient is afebrile, please input 37.8 degrees Celsius)

---

((in degree celsius) )

---

Respiratory rate

---

((in breaths/min))

---

Oxygen saturation

---

((%))

---

Date of birth of the patient?

---

---

Age of the patient

---

Chief complaint

- Chest pain, chest pressure, chest tightness
- Shortness of breath
- Headache
- Vertigo
- Nausea or vomiting
- Abdominal pain
- Discomfort (ghabrahat)
- Blurred vision
- Bilateral leg swelling
- Slurring of speech
- Facial deviation
- Altered mental state
- Decreased urine output
- Any unilateral / one sided limb weakness
- No symptoms (with high BP)
- Others

Chief complaint, others (Specify)

\_\_\_\_\_

If pain was specified in any region, was the pain severity score taken?

- Yes
- Not documented

What is the severity of the pain?

\_\_\_\_\_  
 ((please enter a number between 0 to 10))

Did the patient receive any analgesia for the pain?

- Yes
- No
- Not documented

**What analgesics did the patient receive?**

|                                                  | Yes, Oral                | Yes, IV                  | No                       |
|--------------------------------------------------|--------------------------|--------------------------|--------------------------|
| Opioids (Tramadol, Nalbuphine/Kinz)              | <input type="checkbox"/> | <input type="checkbox"/> | <input type="checkbox"/> |
| Paracetamol                                      | <input type="checkbox"/> | <input type="checkbox"/> | <input type="checkbox"/> |
| NSAIDS (Ketorolac, Naproxen, Diclofenac, Brufen) | <input type="checkbox"/> | <input type="checkbox"/> | <input type="checkbox"/> |
| Others                                           | <input type="checkbox"/> | <input type="checkbox"/> | <input type="checkbox"/> |

Others (Specify)

\_\_\_\_\_

# Assessments and examinations

---

What is the Systolic blood pressure at assigned bed?

\_\_\_\_\_

((in mm/Hg))

---

What is the diastolic blood pressure at assigned bed?

\_\_\_\_\_

((in mm of Hg))

---

What was the pulse at assigned bed?

\_\_\_\_\_

((in beats/min))

---

What was the temperature (in degree Celsius) at assigned bed?

\_\_\_\_\_

((in degree celsius) )

---

What was the respiratory rate at assigned bed?

\_\_\_\_\_

((in beats/min))

---

What was the oxygen saturation at assigned bed?

\_\_\_\_\_

((%))

---

On CNS exam, were any new focal deficits found?

- Yes  
 No  
 Not documented

---

Was the GSC taken?

- Yes  
 Not documented

---

What was the GCS?

\_\_\_\_\_

---

On Chest exam, were any bilateral crackles heard?

- Yes  
 No  
 Not documented

---

On CVS exam. was the jugular venous pressure raised?

- Yes  
 No  
 Not documented

---

On CVS exam, were additional heart sounds heard or an S3 gallop heard?

- Yes  
 No  
 Not documented

---

On a CVS exam, did the patient have pedal edema?

- Yes  
 No  
 Not documented

---

Was a fundoscopy exam performed?

- Yes  
 Not documented

---

Was papilledema noticed on the fundoscopy?

- Yes
- No
- Not documented

## Past Medical History

Does the patient have any co-morbidities?

- Yes  
 No  
 Not documented

### Please select the co-morbid conditions that the patient has.

|                                              | Yes                   | No                    | 99 Not documented     |
|----------------------------------------------|-----------------------|-----------------------|-----------------------|
| Diabetes Mellitus                            | <input type="radio"/> | <input type="radio"/> | <input type="radio"/> |
| Hypertension                                 | <input type="radio"/> | <input type="radio"/> | <input type="radio"/> |
| Cerebrovascular accident/ stroke             | <input type="radio"/> | <input type="radio"/> | <input type="radio"/> |
| Ischemic Heart disease                       | <input type="radio"/> | <input type="radio"/> | <input type="radio"/> |
| Asthma                                       | <input type="radio"/> | <input type="radio"/> | <input type="radio"/> |
| Chronic obstructive pulmonary disease        | <input type="radio"/> | <input type="radio"/> | <input type="radio"/> |
| Interstitial lung disease                    | <input type="radio"/> | <input type="radio"/> | <input type="radio"/> |
| Chronic liver disease                        | <input type="radio"/> | <input type="radio"/> | <input type="radio"/> |
| Dyslipidemia                                 | <input type="radio"/> | <input type="radio"/> | <input type="radio"/> |
| Chronic kidney disease                       | <input type="radio"/> | <input type="radio"/> | <input type="radio"/> |
| Overweight/ obesity                          | <input type="radio"/> | <input type="radio"/> | <input type="radio"/> |
| Smoking/exposed to second hand smoking       | <input type="radio"/> | <input type="radio"/> | <input type="radio"/> |
| Thyroid disorders (Hyper and hypothyroidism) | <input type="radio"/> | <input type="radio"/> | <input type="radio"/> |
| Hepatitis B                                  | <input type="radio"/> | <input type="radio"/> | <input type="radio"/> |
| Hepatitis C                                  | <input type="radio"/> | <input type="radio"/> | <input type="radio"/> |
| Others                                       | <input type="radio"/> | <input type="radio"/> | <input type="radio"/> |

"Others"  
(Please specify)

\_\_\_\_\_

Is the patient taking any anti-hypertensive medications or being prescribed any anti-hypertensive medications?

- Yes  
 No  
 Not documented

### What anti-hypertensive medications is the patient taking or being prescribed?

|                                                                                       | Yes                   | No                    | Not documented        |
|---------------------------------------------------------------------------------------|-----------------------|-----------------------|-----------------------|
| Angiotensin converting enzyme (ACE) inhibitors (captopril, enalapril, lisinopril)     | <input type="radio"/> | <input type="radio"/> | <input type="radio"/> |
| Angiotensin II Receptor Blockers (ARB) (candesartan, valsartan, losartan, erbesartan) | <input type="radio"/> | <input type="radio"/> | <input type="radio"/> |

|                                                                                |                       |                       |                       |
|--------------------------------------------------------------------------------|-----------------------|-----------------------|-----------------------|
| Calcium Channel Blockers<br>(verapamil, amlodipine,<br>nifedipine, diltiazem,) | <input type="radio"/> | <input type="radio"/> | <input type="radio"/> |
| Beta Blockers (atenolol,<br>propranolol, metoprolol,<br>carvedilol, labetalol) | <input type="radio"/> | <input type="radio"/> | <input type="radio"/> |
| Hydralazine                                                                    | <input type="radio"/> | <input type="radio"/> | <input type="radio"/> |
| Diuretics (furosemide - Lasix,<br>spironolactone,<br>hydrochlorothiazide)      | <input type="radio"/> | <input type="radio"/> | <input type="radio"/> |

---

Is the patient compliant to anti-hypertensive medications?  
(taken within 24 hours)  Yes  No  Not documented

# Diagnostic tests

---

Creatinine?  Yes  
 No

---

Creatinine value \_\_\_\_\_

---

CBC?  Yes  
 No

---

Hemoglobin value \_\_\_\_\_

---

Hematocrit value \_\_\_\_\_

---

Platelet count value \_\_\_\_\_

---

BUN?  Yes  
 No

---

BUN value \_\_\_\_\_

---

Electrolytes - Sodium (Na)?  Yes  
 No

---

Sodium value \_\_\_\_\_

---

Electrolyte - Potassium (K)?  Yes  
 No

---

Potassium value \_\_\_\_\_

---

Electrolyte - Chloride?  Yes  
 No

---

Chloride value \_\_\_\_\_

---

Electrolyte - bicarbonate (HCO<sub>3</sub>)?  Yes  
 No

---

Bicarbonate value \_\_\_\_\_

---

Coagulation profile - PT/ INR?  Yes  
 No

---

Prothrombin time \_\_\_\_\_

---

INR \_\_\_\_\_

---

Coagulation profile - APTT?  Yes  
 No

---

Activated partial thromboplastin time \_\_\_\_\_

---

1st troponin test?  Yes  
 No

---

1st troponin value? \_\_\_\_\_

---

2nd troponin test  Yes  
 No

---

2nd troponin value? \_\_\_\_\_

---

ECG performed?  Yes  
 Not found

---

|              | Yes                   | No                    |
|--------------|-----------------------|-----------------------|
| ST-T changes | <input type="radio"/> | <input type="radio"/> |
| LVH          | <input type="radio"/> | <input type="radio"/> |

---

Urine detail report performed?  Yes  
 No

---

Did the urine analysis show proteinuria?  Yes  
 No/ Negative

---

Urine Protein? \_\_\_\_\_

---

Did urine analysis show hematuria?  Yes  
 No/Nil

---

Hemoglobin in urine? \_\_\_\_\_

---

RBCs in urine? \_\_\_\_\_

---

Was chest xray ordered?  Yes  
 No



---

|                                                                                                                  | Yes                   | No                    |
|------------------------------------------------------------------------------------------------------------------|-----------------------|-----------------------|
| Normal/unremarkable                                                                                              | <input type="radio"/> | <input type="radio"/> |
| Signs of fluid overload (Hilar congestion, pulmonary edema, upper lobe diversion, pulmonary vascular congestion) | <input type="radio"/> | <input type="radio"/> |
| Cardiomegaly                                                                                                     | <input type="radio"/> | <input type="radio"/> |

---

Was a CT scan of the head performed?  Yes  No

---

|            | Yes                   | No                    |
|------------|-----------------------|-----------------------|
| Normal     | <input type="radio"/> | <input type="radio"/> |
| Infarction | <input type="radio"/> | <input type="radio"/> |
| Bleeding   | <input type="radio"/> | <input type="radio"/> |

---

Was an MRI of the brain/head performed?  Yes  No

---

|            | Yes                   | No                    |
|------------|-----------------------|-----------------------|
| Normal     | <input type="radio"/> | <input type="radio"/> |
| Infarction | <input type="radio"/> | <input type="radio"/> |
| Bleeding   | <input type="radio"/> | <input type="radio"/> |

# End organ damage

Was a diagnosis of end-organ damage made/ found?

- Yes
- No
- Not documented

## End organ damage details

|                                                                       | Yes                   | No                    | Not documented        |
|-----------------------------------------------------------------------|-----------------------|-----------------------|-----------------------|
| Heart (trop positive OR ST-T changes in ECG)                          | <input type="radio"/> | <input type="radio"/> | <input type="radio"/> |
| Kidney (Proteinuria, raised creatinine)                               | <input type="radio"/> | <input type="radio"/> | <input type="radio"/> |
| Eye (Papilledema)                                                     | <input type="radio"/> | <input type="radio"/> | <input type="radio"/> |
| Brain (Stroke, sub-arachnoid hemorrhage, Hypertensive encephalopathy) | <input type="radio"/> | <input type="radio"/> | <input type="radio"/> |

# Medication/ treatment/ interventions provided during stay

Were Per oral (PO) medications administered?

- Yes
- No
- Not documented

Angiotensin converting enzyme (ACE) inhibitors (captopril, enalapril, lisinopril)

- Yes
- No
- Not documented

Angiotensin converting enzyme dose?

\_\_\_\_\_

Angiotensin II Receptor blockers (ARB) (candesartan, valsartan, losartan, erbesartan)

- Yes
- No
- Not documented

Angiotensin II receptor blockers dose?

\_\_\_\_\_

Calcium channel blockers (Verapamil, amlodipine, nifedipine, diltiazem)

- Yes
- No
- Not documented

Calcium channel blockers dose?

\_\_\_\_\_

Beta Blockers (atenolol, propranolol, metoprolol, carvedilol, labetalol)

- Yes
- No
- Not documented

Beta blockers dose?

\_\_\_\_\_

Hydralazine

- Yes
- No
- Not documented

Hydralazine dose?

\_\_\_\_\_

Diuretics (furosemide - lasix, spironolactone, hydrochlorothiazide)

- Yes
- No
- Not documented

Diuretics dose?

\_\_\_\_\_

Were Intravenous (IV) medications administered?

- Yes
- No
- Not documented

---

Beta blockers (metoprolol, labetalol)

- Yes  
 No  
 Not documented

---

Beta blockers dose?

---

---

Calcium channel blockers (Verapamil, Diltiazem)

- Yes  
 No  
 Not documented

---

Calcium channel blockers dose?

---

---

Hydralazine

- Yes  
 No  
 Not documented

---

Hydralazine dose?

---

---

Diuretics (furosemide - Lasix, spironolactone, hydrochlorothiazide)

- Yes  
 No  
 Not documented

---

Diuretics dose

---

---

Infusion started

- Yes  
 No  
 Not documented

---

Nitrates (nitroprusside and glyceryl trinitrate (GTN))

- Yes  
 No  
 Not documented

---

Nitrate infusion dose?

---

---

Labetalol infusion

- Yes  
 No  
 Not documented

---

Labetalol infusion dose?

---

# ER discharge/ disposition information

ER diagnosis?

\_\_\_\_\_

ER disposition?

- Admitted
- Discharged
- Expired
- Left against medical advice
- Transfer out

Special Care (monitored bed)

- Yes
- No

Days in special bed?

\_\_\_\_\_  
((in days))

ICU/CCU

- Yes
- No

Days in ICU/CCU

\_\_\_\_\_  
((in days))

Ward

- Yes
- No

Days in ward

\_\_\_\_\_  
((in days))

Date of registration in ER

\_\_\_\_\_

Time of registration in ER.  
(24 hours)

\_\_\_\_\_

Date of disposition from ER?

(if 'admitted', Source: ED assessment transfer out form)

\_\_\_\_\_

Time of disposition in the ER?  
(24 hours)

\_\_\_\_\_

Date of hospital discharge  
(Source: Discharge summary)

\_\_\_\_\_

Time of hospital discharge  
(24 hours)

\_\_\_\_\_

Did the patient expire in the hospital during stay?

- Yes
- No

---

Where did the patient expire?

- ER  
 Special Care  
 ICU/CCU  
 Ward
- 

SBP at the time of disposition from the ER?

\_\_\_\_\_

((in mm/Hg))

---

DBP at the time of disposition from the ER?

\_\_\_\_\_

((in mm/Hg))

---

Were discharge instructions related to hypertension provided when the patient was discharged from the hospital?

- Yes  
 No  
 Not documented
- 

Did the discharge instructions include any advice on life style modifications (e.g. low salt diet, exercise, etc.) ?

- Yes  
 No
- 

Low salt diet?

- Yes  
 No
- 

Exercise?

- Yes  
 No
- 

Quit smoking?

- Yes  
 No
- 

Did discharge instructions include B.P. monitoring advice?

- Yes  
 No
- 

Were anti-hypertensive medications prescribed on discharge from ER/ Hospital?

- Yes  
 No  
 Not documented
- 

Please name the anti-hypertensive medications and their respective dosages.

\_\_\_\_\_

---

Did discharge instructions include follow-up visit?

- Yes  
 No
- 

In which service specialty was the follow-up visit of the patient scheduled and when?

- Cardiology  
 Internal medicine  
 Family medicine  
 ED Fast track  
 Neurology  
 Ophthalmology  
 Others
- 

Cardiology follow up days

\_\_\_\_\_

---

Did patient come for the cardiology follow up visit?

- Yes  
 No

---

What was the follow-up visit date for cardiology?

\_\_\_\_\_

---

Internal Medicine follow up days

\_\_\_\_\_

---

Did patient come for the Internal Medicine follow up visit?

- Yes
- No

---

What was the follow up visit date for Internal medicine?

\_\_\_\_\_

---

Family Medicine follow up days

\_\_\_\_\_

---

Did patient come for the family medicine follow up visit?

- Yes
- No

---

What was the follow up visit date for Family medicine?

\_\_\_\_\_

---

ED Fast Track follow up days

\_\_\_\_\_

---

Did patient come for the ED Fast Track follow up visit?

- Yes
- No

---

What was the follow up visit date for ED Fast Track?

\_\_\_\_\_

---

Neurology follow up days

\_\_\_\_\_

---

Did patient come for the neurology follow up visit?

- Yes
- No

---

What was the follow up visit date for Neurology?

\_\_\_\_\_

---

Ophthalmology

\_\_\_\_\_

---

Did patient come for the ophthalmology follow up visit?

- Yes
- No

---

What was the follow up visit date for Ophthalmology?

\_\_\_\_\_

---

Others (please specify)

\_\_\_\_\_

---

Others follow up days

\_\_\_\_\_

---

Did patient come for the "Others" speciality follow up visit?

- Yes
- No

---

What was the follow up visit date for "Others" speciality?

---



# Follow-up questionnaire

---

Date of Discharge

\_\_\_\_\_

---

Date of follow up

\_\_\_\_\_

---

Date of contact established?

\_\_\_\_\_

---

Time of contact established?

\_\_\_\_\_

---

Follow up event

- 1st month follow up
- 3rd month follow up
- 6th month follow up

---

Contact established?  
(call made)

- Yes
- No

---

How many attempts were made to establish contact  
(through telephonic call)?

- 1st attempt
- 2nd attempt
- 3rd attempt
- 4th attempt
- 5th attempt
- 6th attempt
- 7th attempt
- 8th attempt
- 9th attempt
- 10th attempt
- 11th attempt
- 12th attempt
- 13th attempt
- 14th attempt

---

Others, please specify

\_\_\_\_\_

---

What were the reasons for no response?

- Phone engaged
- Phone switched off
- Not answering
- Invalid number
- Number exchanged
- Wrong number
- Others

---

Others, Please specify

\_\_\_\_\_

---

How are you (is the patient) after getting discharged  
from the hospital?

- Alive
- Dead

---

When did the patient expire?

\_\_\_\_\_

---

What was the reason for death?

\_\_\_\_\_

---

Where did the patient die?

- In hospital
- At home
- Others

---

Others (please specify).

---

---

Do you (the patient) regularly monitor your blood pressure readings?

- Yes  
 No

---

How often do you get your blood pressure checked?

- Daily  
 Twice a week  
 Once a week  
 Once a month  
 Randomly  
 On convenience basis (when someone available or BP apparatus is available)  
 Rarely

---

Have you (the patient) tried reducing salt intake since diagnosed with high blood pressure?

- Yes  
 No  
 Unchanged (already using low salt in diet)  
 Others

---

Others, please specify

---

---

Do you (the patient) do any physical activity (other than household chores) for at least 30 minutes a day? (E.g. walking, running, jogging, cycling, swimming, gym, etc.)

- Yes  
 No

---

How often do you (the patient) do any physical activity?

- One day a week  
 Two days a week  
 Three days a week  
 Four days a week  
 Five days a week  
 Six days a week  
 Seven days a week (daily)

---

What other exercise or physical therapy do you (the patient) do?  
E.g. yoga, stretching  
(Please specify)

---

---

Since diagnosis with high blood pressure, did you (the patient) smoke cigarettes?

- Yes  
 No  
 Never smoked

---

How often do you (the patient) smoke cigarettes?

- Daily  
 Not daily  
 Occasionally

---

Were you (the patient) prescribed any blood pressure medications after discharge from the hospital?

- Yes  
 No

---

Are you (the patient) taking those medications regularly?

- Yes  
 No  
 Never

---

Did you (the patient) visit or follow up with your doctor related to blood pressure?

- Yes  
 No

---

Please specify how often it was?

Visited once after discharge  
 Visited twice after discharge  
 Visited more than twice after discharge (around once a week)

---

Have you (the patient) developed or suffered from any other illness because of hypertension?

Yes  
 No

---

What was the illness?

Stroke  
 Heart attack  
 Kidney disease  
 Eye disease  
 Other illness or condition

---

Other illness or condition  
(please specify)

\_\_\_\_\_

---

Were you (the patient) admitted again since your discharge from the Aga Khan University?

Yes  
 No

---

What was the reason for your admission to the hospital?

High blood pressure  
 Chest pain  
 Heart attack  
 Stroke, one sided weakness  
 Headache  
 Kidney failure  
 Others

---

Others  
(Please specify)

\_\_\_\_\_

---
